# Supplementary material for: Physician-Assisted Dying: Acceptance by Physicians Only for Patients Close to Death
Source: Springer Nature journal article supplement (doi:10.1007/s40122-014-0029-z), 2014-12-01
Supplement: MOESM1 [file 9339874]

- Prior to the starting German parliamentary discussion on euthanasia and physician-assisted suicide, a survey was performed among physicians.
- The questionnaires were handed out at a congress/symposium on palliative care and pain, respectively.
- The definite support for euthanasia in terminal illness (6.6%) was lower than for physician-assisted suicide (13.1%).
- The definite support for both euthanasia and physician-assisted suicide was lower in case of non-terminal illness (2.2% and 1.5%, respectively).
- Physicians with a special qualification in palliative care or pain medicine were more reluctant towards both euthanasia and physician-assisted suicide.

This summary slide represents the opinions of the authors. No funding or sponsorship was received for this study or publication of this article. For a full list of acknowledgments and conflicts of interest for all authors of this article, please see the full text online. Copyright © The Author(s) 2014. Creative Commons Attribution Noncommercial License (CC BY-NC).
